# Supplementary material for: Magnetic Simulations of Core–Shell Ferromagnetic Bi-Magnetic Nanoparticles: The Influence of Antiferromagnetic Interfacial Exchange
Source: MDPI journal article supplement (doi:10.3390/nano11061381), 2021-05-24
Supplement: s1 [file s1]

# Supporting Information for Magnetic Simulations of Core-Shell Ferromagnetic Bi-Magnetic Nanoparticles: The Influence of Antiferromagnetic Interfacial Exchange

Juan A. Ramos-Guivar <sup>1,\*</sup>, Carlo A. Tamanaha-Vegas <sup>1</sup>, Fred Jochen Litterst <sup>2,3</sup> and Edson C. Passamani <sup>4</sup>

<sup>1</sup> Grupo de Investigación de Nanotecnología Aplicada para Biorremediación Ambiental, Energía, Biomedicina y Agricultura (NANOTECH), Facultad de Ciencias Físicas, Universidad Nacional Mayor de San Marcos, Av. Venezuela Cdra 34 S/N, Ciudad Universitaria, Lima 15081, Perú;  
carlo.levano@unmsm.edu.pe

<sup>2</sup> Institut für Physik der Kondensierten Materie, Technische Universität Braunschweig, 38106 Braunschweig, Germany; j.litterst@tu-braunschweig.de

<sup>3</sup> Centro Brasileiro de Pesquisas Físicas, Rio de Janeiro 22290-180, Brazil

<sup>4</sup> Department of Physics, Federal University of Espirito Santo-UFES, Vitória 29075-910, Brazil;  
edson.caetano@ufes.br

\* Correspondence: juan.ramos5@unmsm.edu.pe;  
Tel.: +51-1-914728212

## Supplementary figures

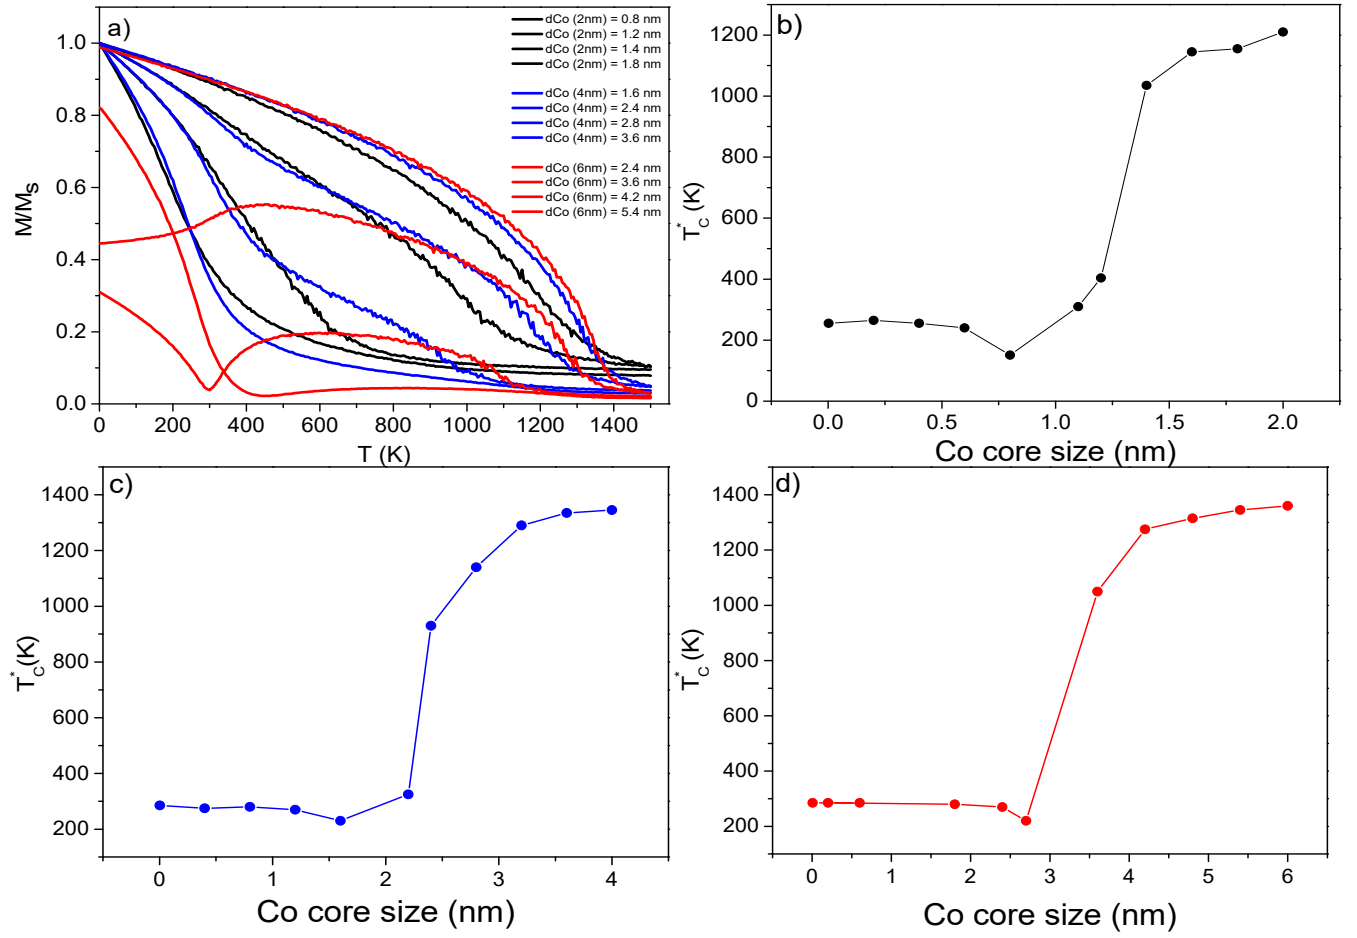

**Figure S1.** Normalized  $M(T)/M_S$  curves for the core-shell bi-magnetic Co@Gd NP with total diameter of 2, 4, and 6 nm (a) for a positive interfacial exchange. Dependence of the  $T_c^*$  on the Co core size for a total particle size: 2 nm (b), 4 nm (c), and 6 nm (d).

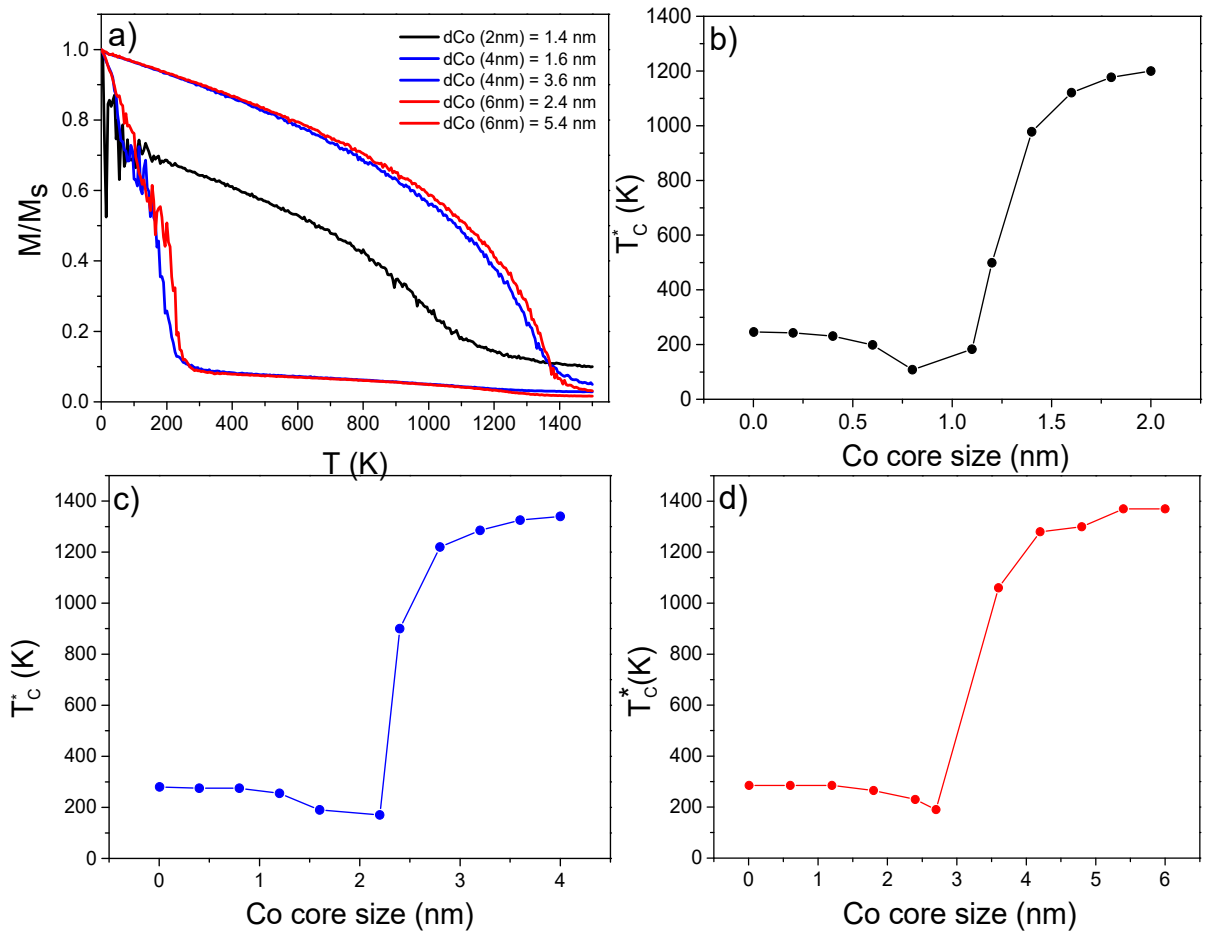

**Figure S2.** Normalized  $M(T)/M_S$  curves for the core-shell bi-magnetic Co@Gd NP with total diameter of 2, 4, and 6 nm (a) for a zero interfacial exchange. Dependence of the  $T_C^*$  on the core Co size for a total particle size: 2 nm (b), 4 nm (c), and 6 nm (d).

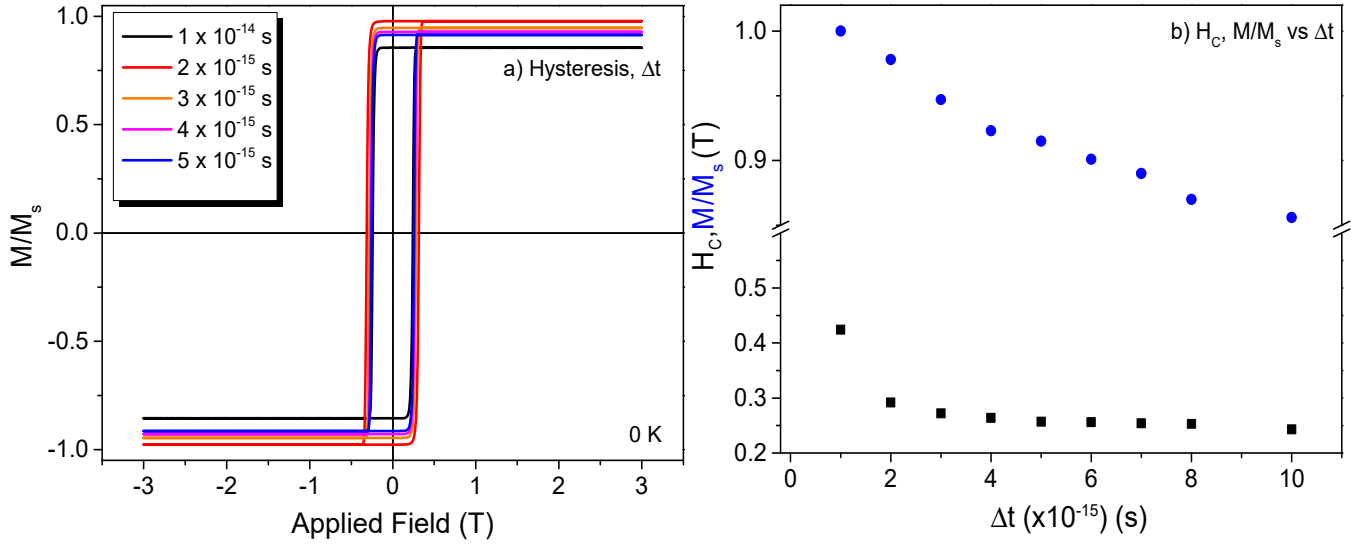

**Figure S3.** Normalized  $M(H)$  curves under different  $\Delta t$  values at 0 K (a) and  $\Delta t$  dependence of the  $H_c$  and  $M/M_s$  parameters (b).

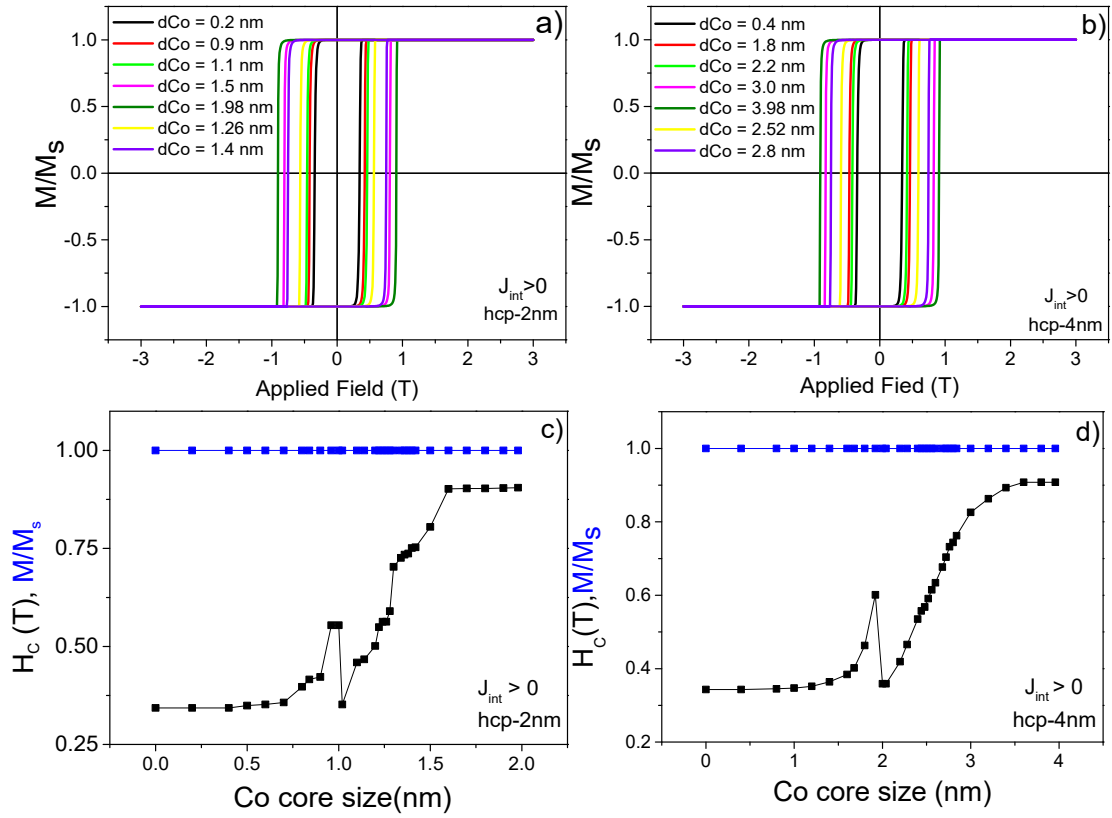

**Figure S4.** Normalized  $M(H)/M_s$  curves for Co core size for a total core-shell size of 2 nm (a) and 4 nm (b) for positive interfacial exchange constant. Dependence of the Co core size of the  $H_c$  and  $M/M_s$  values for 2 nm (c) and 4 nm (d).

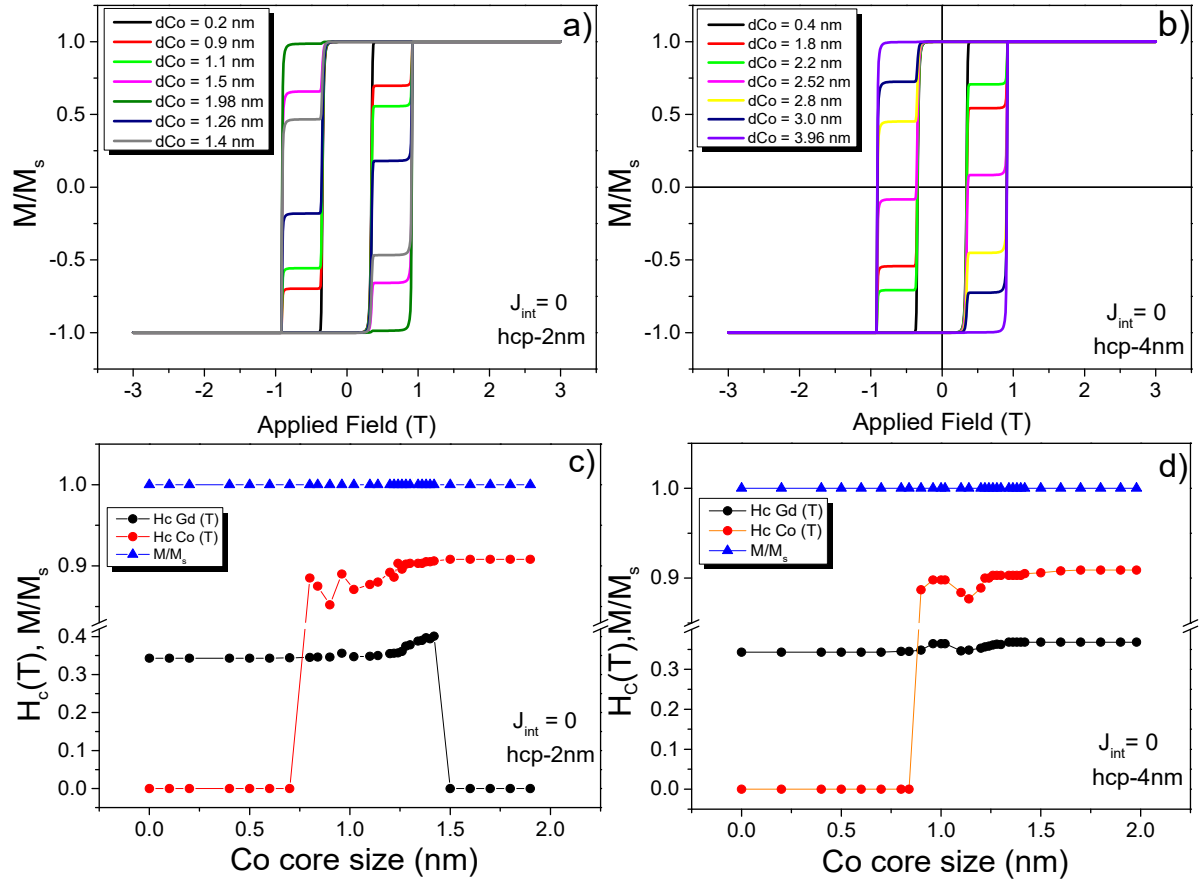

**Figure S5.** Normalized  $M(H)/M_s$  curves for different Co core size for a total core-shell size of 2 nm (a) and 4 nm (b) for zero interfacial exchange constant. Dependence of the Co core size of the  $H_c$  and  $M/M_s$  values for 2 nm (c) and 4 nm (d).

### Supplementary Tables

**Table S1.** Critical exponents obtained using the finite-size scaling law fitting for Co and Gd NPs.  $T_c$  bulk values of Co = 1388 K [2] and Gd equal to 293 K [7] for reference. The errors are found between parenthesis.

|               | Spheres  | Cylinders | Cubes    |
|---------------|----------|-----------|----------|
| $T_c$ -Co (K) | 1388 (2) | 1225 (2)  | 1388 (2) |
| $d_0$ -Co     | 0.33 (1) | 0.30 (3)  | 0.31 (3) |
| $z$ -Co       | 1.21 (3) | 1.12 (5)  | 1.14 (6) |
| $T_c$ -Gd (K) | 290 (3)  | 290 (3)   | 290 (3)  |
| $d_0$ -Gd     | 0.42 (2) | 0.37 (2)  | 0.30 (3) |
| $z$ -Gd       | 1.37 (5) | 1.37 (7)  | 1.21 (7) |
